# Supplementary material for: The Effects of Environmental Sustainability Labels on Selection, Purchase, and Consumption of Food and Drink Products: A Systematic Review
Source: PubMed Central journal article supplement (PMC8384304; doi:10.1177/0013916521995473), 2021-02-20

## Online Appendix

Supplemental Table 1. MEDLINE search strategy

# ▲ Searches

- 1 (ecolabel\$ or eco-label\$).ti,ab.
- 2 ((environment\$ or ecolog\$ or eco or sustain\$ or green\$) adj5 label\$).ti,ab.
- 3 ((carbon footprint or recycl\$ or organic\$) adj5 label\$).ti,ab.
- 4 1 or 2 or 3
- 5 Food Preferences/
- 6 Eating attitudes/
- 7 Feeding Behavior/
- 8 exp Eating/
- 9 Diets/
- 10 choice behavior/
- 11 (intak\$ or consume or consumes or consumption or consumed or eat\$ or diet\$).ti,ab.
- 12 (food adj5 (preference\$ or habit\$ or behavio?r\$ or choice\$ or decision\$ or decid\$ or inclin\$ or lik\$ or choos\$ or select\$ or pick\$)).ab,ti.
- 13 ((drink? or beverage?) adj5 (preference\$ or habit\$ or behavio?r\$ or choice\$ or decision\$ or decid\$ or inclin\$ or lik\$ or choos\$ or select\$ or pick\$)).ab,ti.
- 14 (purchas\$ or buy\$ or sale\$ or vend\$ or sell\$).ab,ti.
- 15 Consumer behavior/
- 16 ((willing\$ or motivat\$ or happy) adj5 (pay\$ or spend\$)).ti,ab.
- 17 5 or 6 or 7 or 8 or 9 or 10 or 11 or 12 or 13 or 14 or 15 or 16
- 18 4 and 17

Supplemental Figure 1. PRISMA flow diagram of study inclusion

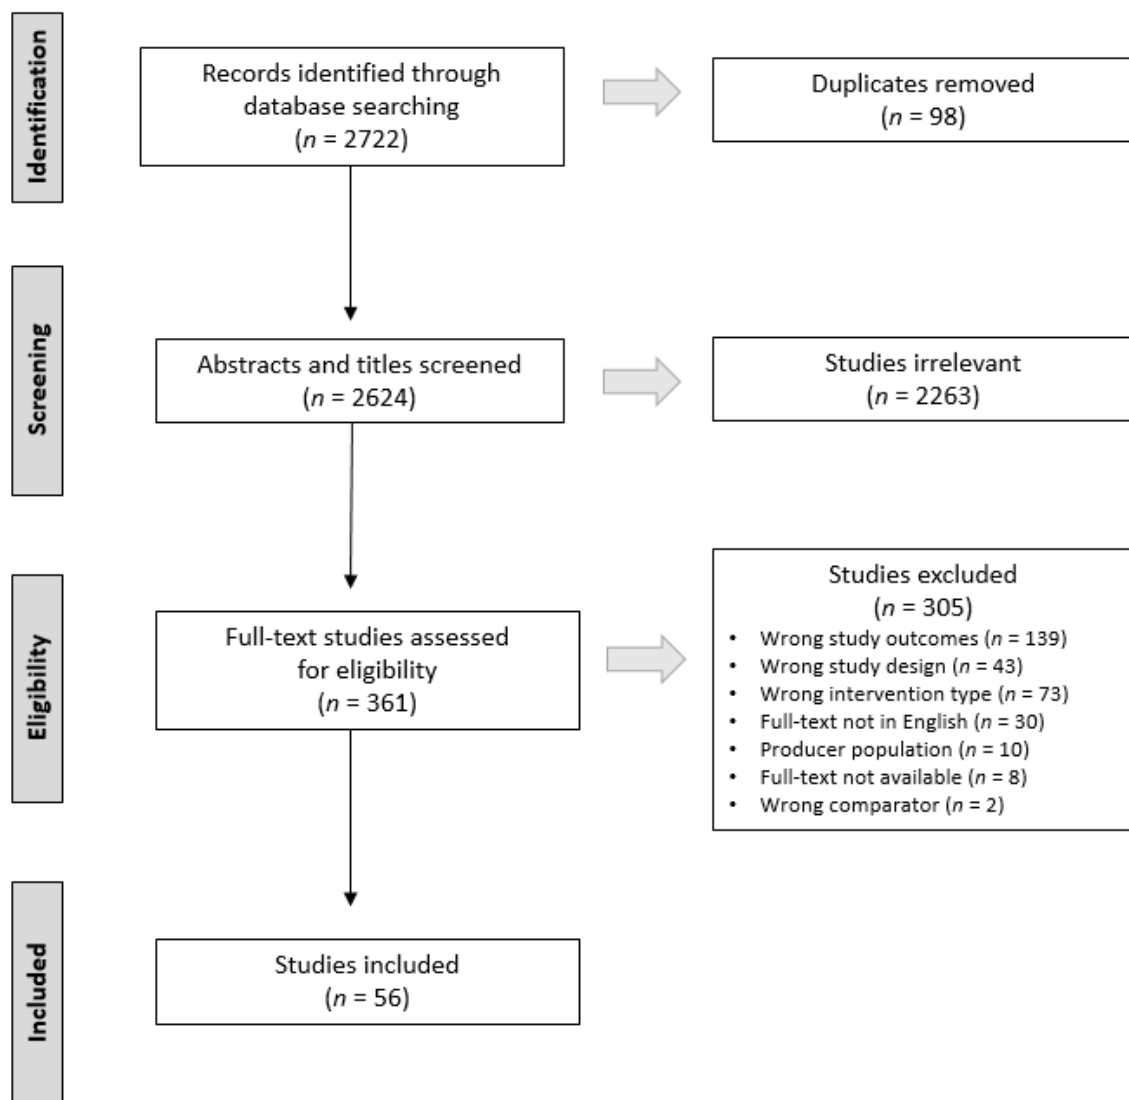

Supplement: sj-pdf-1-eab-10.1177_0013916521995473.pdf [file sj-pdf-1-eab-10.1177_0013916521995473.pdf]
